# Supplementary material for: The glucosyltransferase activity of C. difficile Toxin B is required for disease pathogenesis
Source: PubMed Central journal article supplement (PMC7531778; doi:10.1371/journal.ppat.1008852), 2020-09-22
Supplement: ppat.1008852.s001.pdf [file ppat.1008852.s001.pdf]

**Table S1: Oligonucleotide primers**

| <b>Primer</b>                  | <b>Sequence 5'-3'</b>                           |
|--------------------------------|-------------------------------------------------|
| <b><i>tcdA</i> deletion</b>    |                                                 |
|                                |                                                 |
| <i>tcdA</i> KOC LAF            | TTTTTTCCTGCAGGGTTTTGGAATAGATGGAGGAATCAG         |
| <i>tcdA</i> KOC LAR            | ACATATATTTTAGCCAGACATAAAAACCTCCTAGTATTATTATTTTG |
| <i>tcdA</i> KOC RAF            | GAGGTTTTTATGTCTGGCTAAAATATATGTTTGATAAAAAATTATTC |
| <i>tcdA</i> KOC RAR            | AAAAAAGGCGCGCCGATGGTAACGAATTTAGTAATGAAGG        |
| <i>tcdA</i> diag F             | GGTGGACTATGATGAATGCAC                           |
| <i>tcdA</i> diag R             | CACCTCTAAATCACTGAGTC                            |
| <i>tcdA</i> int F              | GGAGAAGTCAGTGATATTGC                            |
| <i>tcdA</i> int R              | GATGCTGCAGCTAAATTTCC                            |
|                                |                                                 |
| <b>GTD D270N substitution</b>  |                                                 |
|                                |                                                 |
| GTD F                          | TTTTTTCCTGCAGGAACGTCTTTATTCAATCGAAGAGC          |
| GTD mut R                      | CAGATATTCTTAATAT <b>ATT</b> AGAAGCAGCAG         |
| GTD mut F                      | CTGCTGCTTCT <b>AAT</b> ATATTAAGAATATCTG         |
| GTD R                          | AAAAAAGGCGCGCCTTGCAAATAAGTTACATGCTGC            |
| GTD SCO F                      | CTTGTAAATTAATGAGCTTAAAG                         |
| GTD diag F                     | GGAGATAGATGAACTTAATACC                          |
| GTD diag R                     | GCTTCTAACTTTGTCATTTCC                           |
|                                |                                                 |
| <b>SCO determination</b>       |                                                 |
|                                |                                                 |
| <b>YN3 F</b>                   | CTCCATCAAGAAGAGCGAC                             |
| <b>YN3 R</b>                   | CTTTCTATTCAGCACTGTTATGCC                        |
|                                |                                                 |
| <b><i>pyrE</i> restoration</b> |                                                 |
|                                |                                                 |
| <i>pyrE</i> F                  | GGAGCTACTTGTATCCAAG                             |
| <i>pyrE</i> R                  | CCTAATTCCTTGAACCTC                              |
|                                |                                                 |
|                                |                                                 |
|                                |                                                 |
|                                |                                                 |
