# Supplementary material for: The glucosyltransferase activity of C. difficile Toxin B is required for disease pathogenesis
Source: PubMed Central journal article supplement (PMC7531778; doi:10.1371/journal.ppat.1008852), 2020-09-22

a)

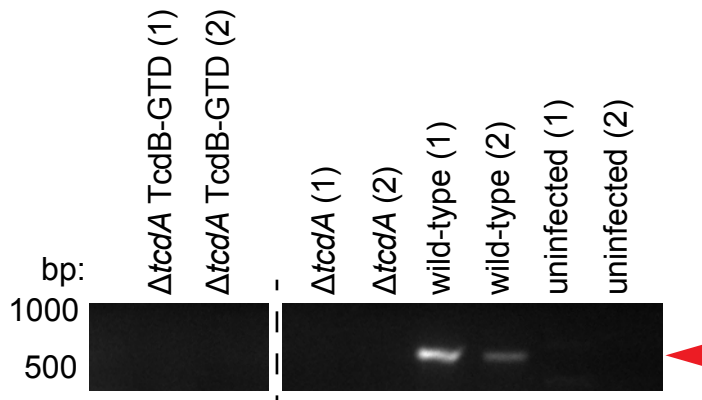

b)

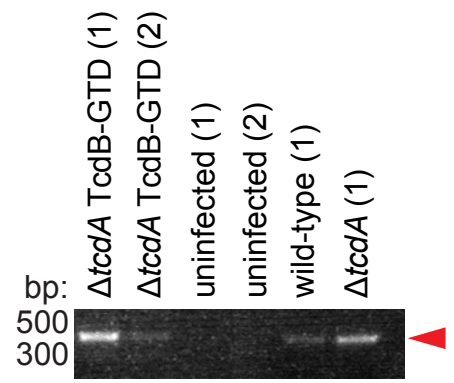

c)

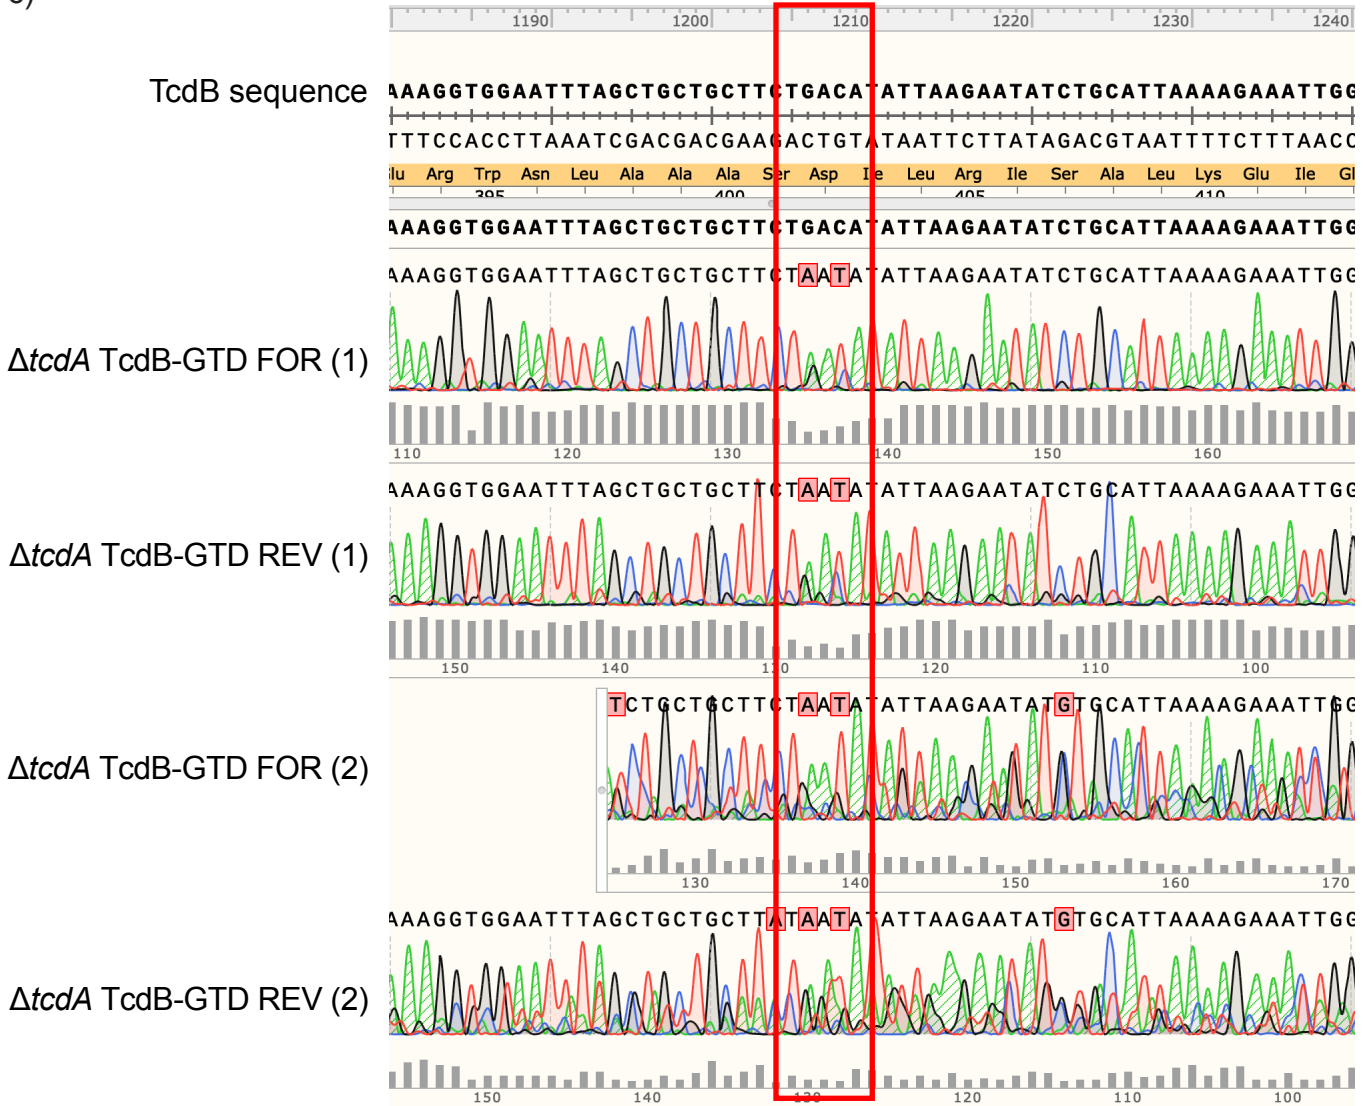

Supplement: ppat.1008852.s002.pdf [file ppat.1008852.s002.pdf]
